# Supplementary material
Source: PubMed Central journal article supplement (PMC7152761)
Supplement: supp_RA119.011491_156486_3_supp_480523_q67v8n.pdf [file supp_RA119.011491_156486_3_supp_480523_q67v8n.pdf]

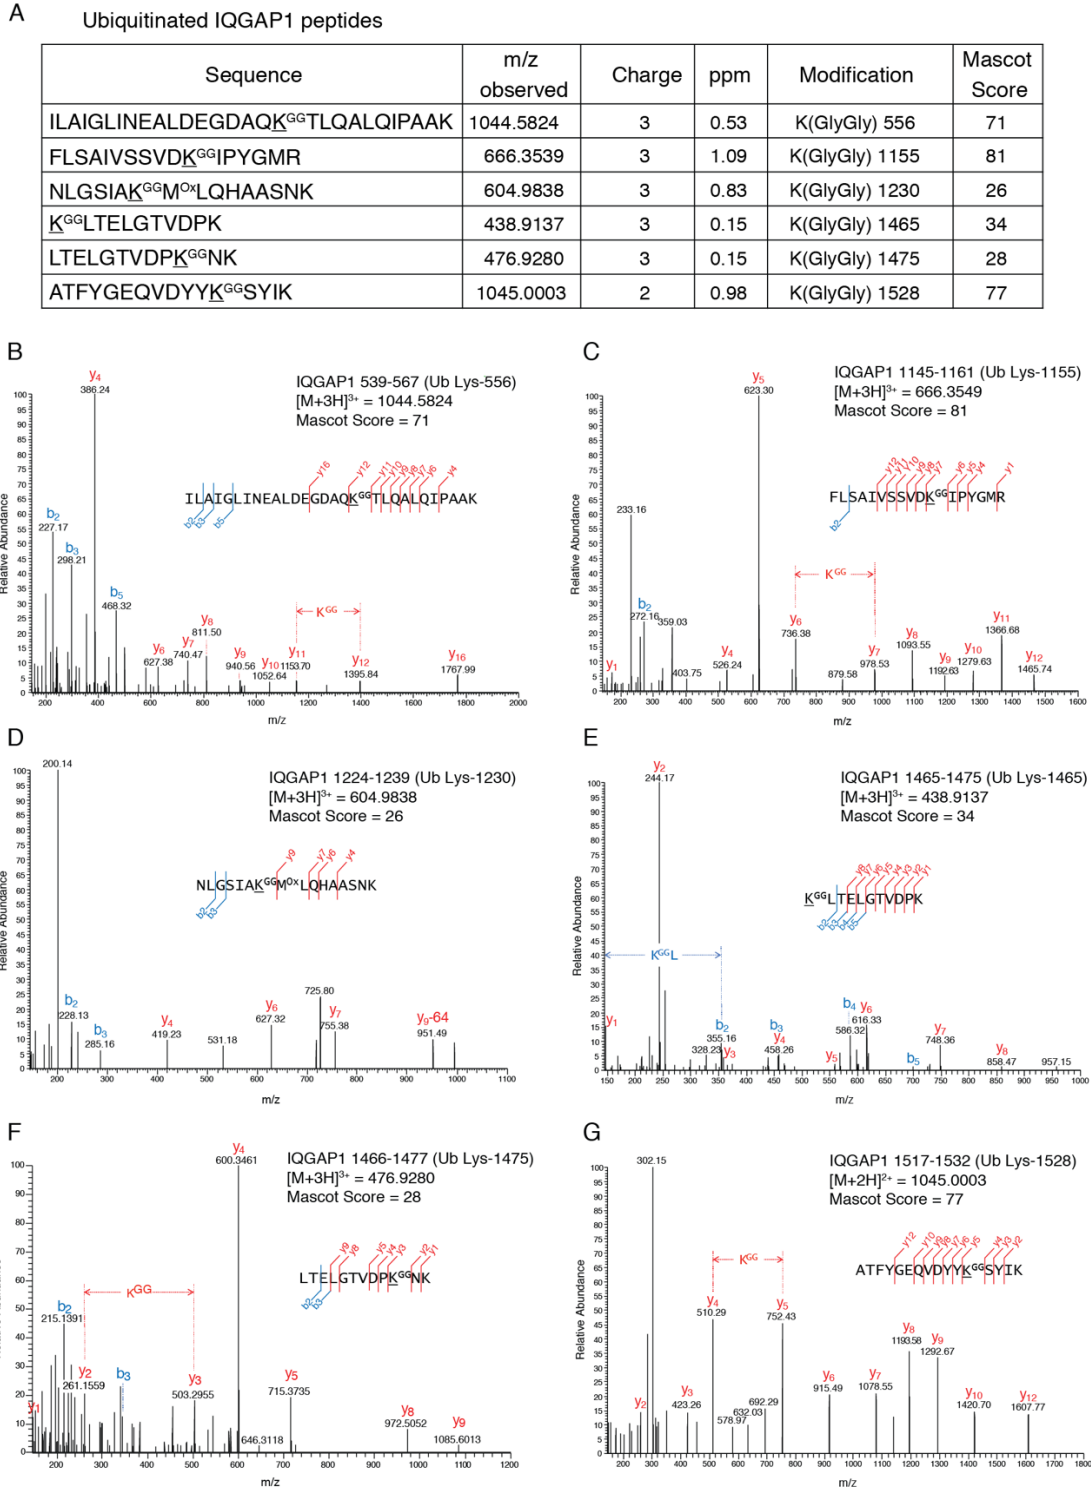

**Figure S1. Summary of mass spectrometry data.** (A) Table summarizing mass spectrometry results for each identified peptide. (B-G) Representative mass spectra for ubiquitinated IQGAP1 peptides. (B) 539-567 containing ubiquitinated Lys-556. (C) 1145-1161 containing ubiquitinated Lys-1155. (D) 1224-1239 containing ubiquitinated Lys-1230. (E) 1465-1475 containing ubiquitinated Lys-1465. (F) 1466-1477 containing ubiquitinated Lys-1475. (G) 1517-1532 containing ubiquitinated Lys-1528.

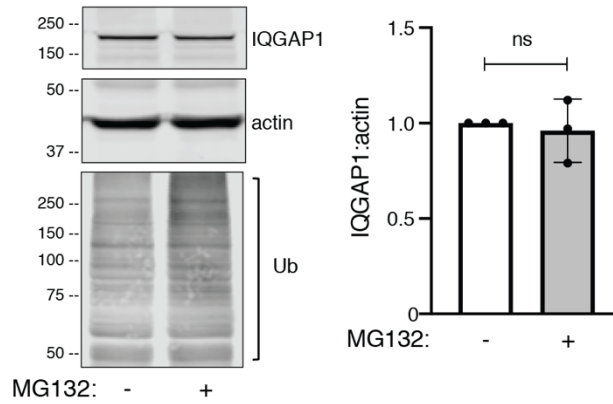

**Figure S2.** MG132 does not alter the amount of IQGAP1 in cell lysates.

(A) HEK293 cells were incubated with MG132 (+) or DMSO (-) for 4 h. Equal amounts of protein lysate were analyzed by Western blotting using anti-IQGAP1, anti-actin and anti-ubiquitin (Ub) antibodies. (B) The IQGAP1 bands were quantified with Image Studio 2.0 and corrected for the amount of actin in the same sample. Data are expressed as means  $\pm$  SD (n=3) and compared using Welch's t-test, with cells incubated with DMSO set as 1. ns: not significant.

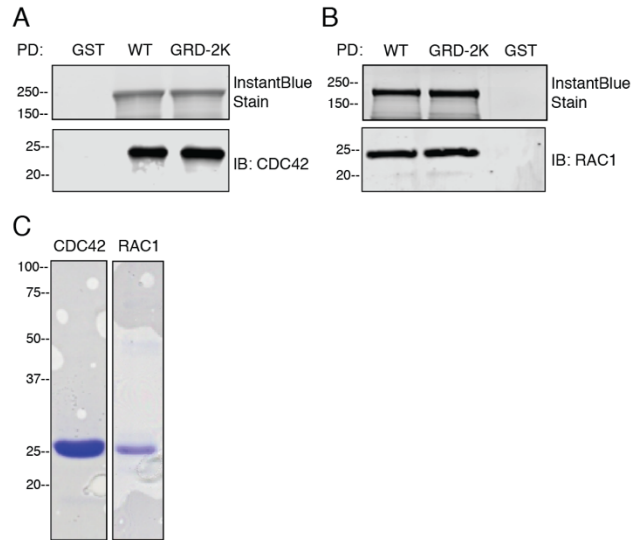

**Figure S3.** Lysine mutations in the GRD of IQGAP1 do not disturb interactions between IQGAP1 and CDC42 or RAC1.

(A) Purified His-CDC42(Q61L) was incubated with equal amounts of purified GST-tagged WT IQGAP1 (WT) or IQGAP1 GRD-2K (GRD-2K) or GST alone. Complexes were isolated with glutathione-Sepharose (PD) and bound proteins were analyzed by SDS-PAGE. The gel was cut at ~50kDa; the upper section of the gel was stained with InstantBlue Protein Stain, while the lower section was processed by Western blotting and probed with anti-CDC42 antibodies. (B) RAC1 pulldown was performed as described above for CDC42, except His-RAC1(Q61L) was used and the Western blot was probed with anti-RAC1 antibodies. Data are representative of 2 to 4 experiments. (C) Purified His-CDC42(Q61L) and His-RAC1(Q61L) proteins were resolved by SDS-PAGE and stained with InstantBlue Protein Stain to show purity.

*Role of IQGAP1 ubiquitination in CDC42 regulation*

|        |                                                                                     |      |
|--------|-------------------------------------------------------------------------------------|------|
| IQGAP1 | S KEKREKLEAY QHL FY LLQ TN PTY LAKLI FQMPQNK STK FMDSV IFTLY NY ASNQREEY L          | 1021 |
| IQGAP2 | S KERRKTLE TY QQL FY LLQ TN PLY LAKLI FQMPQNK STK FMDTV IFTLY NY ASNQREEY L         | 934  |
| IQGAP3 | S KEKRQKLEAY QHL FY LLQ TQ PIY LAKLI FQMPQNK TTK FMEAV IFSLY NY ASSRREAY L          | 1005 |
| IQGAP1 | LLRL FK TALQE EIK SKVDQ IQEIV TGNPT VI KMVVS FNR GARGQNALRQ I LAPVVK EIMD           | 1081 |
| IQGAP2 | LLKL FK TALEE EIK SKVDQ VQDIV TGNPT VI KMVVS FNR GARGQNT LRQL LAPVVK EIID           | 994  |
| IQGAP3 | LLQL FK TALQE EIK SKVEQ PQDVV TGNPT VVRLVVR FYRNGRGQ SALQE I LGKV IQDVLE            | 1065 |
| IQGAP1 | DKSLNI KTD PVDIY KSWN QMESQ TGEAS KL PYDVT PEQAL AHE EVKTR LDSSI RNMRAV             | 1141 |
| IQGAP2 | DKSL I I NTN PVEVY KAWVN QLETQ TGEAS KL PYDVT TEQAL TYPEVKNK LEAS I ENLRRV          | 1054 |
| IQGAP3 | DKVL SVHTD PVHLY KNWIN QT EAQ TGQRS HL PYDVT PEQAL SHPEVQRR LD IALRNLLAM            | 1125 |
| IQGAP1 | T DKFLSAIV SSVD <u>K</u> IPYGMRF IAKVL KDS LHEKF PDAGE DE LLK I I GNLLY YRYMNP AI V | 1201 |
| IQGAP2 | T DKVLNS I I SS LDLPYGLRY IAKVL KNS IHEKF PDATE DE LLK IVGNLLY YRYMNP AI V          | 1114 |
| IQGAP3 | T DKFLLAIT SSVDQ IPYGMRY VAKVL KAT LAEKFPD ATD SEVYKVV GNLLY YRFLNPAVV              | 1185 |
| IQGAP1 | APDAFD IIDLS AGGQL TTDQRNLGS IA <u>K</u> MLQHAASNKMFLGDNAHLSI INEYLSQSYQK           | 1261 |
| IQGAP2 | APDGF D IIDMT AGGQI NSDQRNLGS VAKVL QHAASNKL FEGENEHLSSMNNYLSETYQE                  | 1174 |
| IQGAP3 | APDAFD IVAMA AGGALAAPQRHALGAVALLQHAAGKAFSGSQHLRV LNDYLEE THLK                       | 1245 |
| IQGAP1 | FRRF FQTAC DVPELQDKFN VDEYS DLVTL TKPVI YI SIGEI INTHT LLLDHQDA IAP EHN             | 1321 |
| IQGAP2 | FRKY FKEACNV PEPEEKFNMDKYTDLVTVSKPVI YI SIEEI ISTHS LLEH QDA IAP EKN                | 1234 |
| IQGAP3 | FRKF IHRACQV PEPEERFAVDEYS DMVAV AKPMVYI TVGELVNT HR LLEH QDC IAPDHQ                | 1305 |
| IQGAP1 | DPIHEL LDDLG EVP TIESLIGESS                                                         | 1345 |
| IQGAP2 | DLLSEL LGS LG EVP TVESFLGEGA                                                        | 1258 |
| IQGAP3 | DPLHEL LEDLGELPTI PDLIGESI                                                          | 1329 |

**Figure S4.** Amino acid alignments of the GRD of human IQGAPs. Sequences of the GRD of IQGAP1 (962-1345), IQGAP2 (875-1258) and IQGAP3 (946-1329) were aligned by Clustal W Multiple Alignment. Lys-1155 and Lys-1230 of IQGAP1 are underlined and colored red.

**Video S1.** Time-lapse wound healing assay of IQGAP1-null MEFs expressing GFP-tagged WT IQGAP1 or IQGAP1 GRD-2K. The video corresponds to the experiment shown in Fig. 6B.
